1 Accumulation and retention of radioactive elements in biofilm communities surrounding the  
2 accident site of the Fukushima Daiichi Nuclear Power Plant

3

4 Shigeharu Moriya<sup>1, 3, \*</sup>, Hideaki Otsu<sup>2</sup>, Kumiko Kihara<sup>1, 4</sup>, Yukari Kato<sup>1</sup>, Misao Itouga<sup>1</sup>, Kenji  
5 Sakata<sup>1</sup>, Jun Kikuchi<sup>1, 3</sup>, Hiroshi Yamakawa<sup>5, 6</sup> and Jiro Suga<sup>6</sup>

6

7 1) RIKEN Center for Sustainable Resource Science, 1-7-22 Suehiro-cho, Tsurumi-ku,  
8 Yokohama city, Kanagawa 230-0045, JAPAN

9 Shigeharu Moriya, Kumiko Kihara, Yukari Kato, Misao Itouga, Kenji Sakata, and Jun  
10 Kikuchi

11 2) RIKEN Nishina Center for Accelerator-Based Science, 2-1 Hirosamwa, Wako city,  
12 Saitama 351-0198, JAPAN

13 Hideaki Otsu

14 3) Graduate School of Medical Life Science, Yokohama-city University, 1-7-29 Suehiro-cho,  
15 Tsurumi-ku, Yokohama city, Kanagawa 230-0045, JAPAN

16 Shigeharu Moriya and Jun Kikuchi

17 4) Department of Biological and Chemical Systems Engineering, National Institute of  
18 Technology, Kumamoto College, 2627 Hirayama-Shinmachi, Yatsushiro-shi, Kumamoto  
19 866-8501, JAPAN

20 Kumiko Kihara

21 5) Tokyo University of Marine Science and Technology, 4-5-7 Konan, Minato-ku, Tokyo  
22 108-8477, JAPAN

23 Hiroshi Yamakawa

24 6) Japan Academy of Underwater Sciences, 3-9-1-301 Botan, Koto-ku, Tokyo 135-0046,

25 JAPAN

26 Hiroshi Yamakawa and Jiro Suga

27

28 \*Corresponding author: Shigeharu Moriya

29 RIKEN Center for Sustainable Resource Science, 1-7-22 Suehiro-cho, Tsurumi-ku,

30 Yokohama city, Kanagawa 230-0045, JAPAN

31 Tel +81-45-508-7221, Fax +81-45-508-7363

32 Email: [smoriya@riken.jp](mailto:smoriya@riken.jp)

33

34 Abstract

35 After the Fukushima Daiichi Nuclear Power Plant accident, various surveys have been  
36 performed to measure the extent of radioactive contamination in marine sediments, surface  
37 waters, plankton, and fish. However, the radioactive contamination of one of the most  
38 important ecological niches, biofilms, has not been investigated. Therefore, in this study, we  
39 sampled biofilms from sea floor stones around Hisanohama Port, which is less than 30 km  
40 south of the accident site, and then analyzed the microbial community structure and  
41 element profiles, including those of radioactive elements, of these biofilms in order to  
42 determine the accumulation and retention of radioactive elements in them. Our results  
43 showed that the biofilm samples contained relatively high levels of radioactive cesium even  
44 when the sampling was performed 8–11 months after the accident. Our results also  
45 suggested that the structure of the biofilm organismal community is related to the element  
46 profile of radioactive cesium. Thus, our study suggests that biofilms are a possible  
47 radioactive compound accumulator in the natural environment and that they can retain  
48 radioactive material for at least 8–11 months.

49

50

51 Introduction

52 Following the Great East Japan Earthquake and catastrophic tsunami in March of 2011,  
53 the accident at the Fukushima Daiichi Nuclear Power Plant (FDNPP) led to the release of  
54 large amounts of radioactive materials into the atmosphere and marine environment. This  
55 release of radioactive elements from the FDNPP introduced a variety of radioisotopes,

56 especially radiocesium ( $^{134}\text{Cs}$  and  $^{137}\text{Cs}$ ), into marine waters. Public monitoring showed that  
57 during several months after the first explosion at the FDNPP, a rapid decrease in  
58 radioisotopes was observed in the nearby seawater. A joint official survey team from the  
59 Tokyo Power Electric Company (TEPCO), Fukushima prefectural government, and the  
60 Japanese Ministry of Education, Culture, Sports, Science and Technology (MEXT) reported  
61 that the  $^{137}\text{Cs}$  contamination level in the seawater quickly decreased from over 10 k Bq/L to  
62 less than 100 Bq/L within a 2-month period. However,  $^{137}\text{Cs}$  in the ocean sediments was  
63 continuously observed over this period at levels between 100 Bq/dry kg and 1,000 Bq/dry kg  
64 at least until September 2012 (Kanda, 2012). This disproportional distribution of  
65 radioisotopes was also observed in marine fish by Wada et al., who reported that the  
66 retention time of radiocesium appears to be remarkably longer in the larvae of demersal fish  
67 such as *Sebastes cheni* than in surface fish such as *Eugraulis japonica* (Wada et al., 2013).  
68 These disproportional distributions of radioactivity suggest that the sea floor eco-system,  
69 including sedimental microbes and biofilms, may play role in the accumulation of  
70 radioactive elements.  
71 Therefore, in this study, we analyzed the biofilm community on the surface of sea floor rocks  
72 with a focus on the element profiles, including those of radioactive elements. Our results  
73 showed that all the biofilm community contained and retained relatively high levels of  
74 radioactive cesium even when the sampling was performed 8–11 months after the accident.  
75 Our findings indicate that biofilm organism community structures are likely related to their  
76 element profiles, including that of radiocesium.

77

78

79 Materials and Methods

80 Sampling

81 Sampling was performed from November 11, 2011, to February 4, 2012. The sampling site

82 was the ocean along the coastline of Hisanohama, Iwaki City, Fukushima, Japan. We

83 collected samples 10 times within the established time period on November 11 (week 1),

84 November 20 (week 2), November 26 (week 3), December 3 (week 4), December 10 (week 5),

85 December 17 (week 6), January 14 (week 7), January 21 (week 8), January 29 (week 9), and

86 February 4 (week 10). Sampling was performed at six different locations near Hisanohama

87 Port: Area 1 (37.153762N 141.006167E, weeks 1 and 5), Area 2 (approximately 37.149863N

88 141.001017E, weeks 2, 8, and 9), Area 3 (approximately 37.146579N 141.002390E, week 4),

89 Area 3' (approximately 37.147503N 141.008570E, week 10), Area 4 (approximately

90 37.133887N 141.002390E, weeks 3 and 7), and Area 4' (approximately 37.142953N

91 141.003592E, week 6); all of these sampling sites are located 30 km south of the Fukushima

92 Nuclear Power Plant #1. Sampling was performed by divers using a self-contained

93 underwater breathing apparatus (SCUBA) at a depth of 5–10 m. The divers sampled the

94 bottom water and surface water (5 L) and collected bottom stones to obtain the biofilms. The

95 samplings were performed with permission from Fukushima Prefecture and the fishery

96 association of Iwaki City.

97

98 Sample preparation

99 The seawater samples were immediately filtered using two 24-mm-wide 0.22- $\mu$ m Durapore

100 filters (Millipore, MA, USA) until they clogged. All the samples were then frozen at -20°C in  
101 a portable freezer prior to transportation back to the laboratory.

102 In the laboratory, the water samples were dried by boiling. The remaining salts (seawater  
103 salt) were allowed to settle into a U8 container, and the net weight (weight of container with  
104 sample – weight of empty container) and height of the samples were measured in the  
105 container.

106 In the case of biofilms, the bottom stones were rinsed with purified water and then brushed  
107 down with a clean brush using purified water. The obtained biofilm suspension was then  
108 divided into two aliquots. One aliquot was filtered through 24-mm-wide 0.22- $\mu$ m Durapore  
109 filters (Millipore, MA, USA) and stored at -20°C for ribosomal RNA gene analysis, and the  
110 other one was dried at 105°C in an oven and then allowed to settle into a U8 container; the  
111 weight and height were then measured in the container for measurement of radioactivity.

112

113 Measurement of radioactivity

114 The gamma-ray activity of the samples in the containers was measured using a Germanium  
115 (Ge) detector. The detector setup was identical to that described previously (HABA et al.,  
116 2012). The energy resolution of 2 keV full width at half maximum (FWHM) was achieved at  
117 1332.5 keV gamma rays. The sample location and detector were surrounded with 15-cm lead  
118 blocks to reduce the background radiation during gamma ray spectroscopy. The detection  
119 efficiency of the gamma rays was calibrated with an accuracy of 2%–10% using a multiple  
120 gamma ray standard source, which ranged from 88–1836 keV. A calibrated  $^{134}\text{gCs}$  source  
121 was also used to correct for the coincidence summing for radioactivity determinations of

122  $^{134}\text{gCs}$ .

123 Every sample was contained in a U8 plastic container. The U8 container is a standard  
124 container in Japan that is used for measurements of absolute radioactivity with high  
125 accuracy using a Ge detector. The shape of the container is cylindrical, with a diameter of 47  
126 mm and height of 60 mm. The volume is approximately 100 mL. The efficiency calibration  
127 source is available within the container with a uniform density.

128 Every sample was measured using the Ge detector for at least 8 h to obtain sufficient  
129 statistics for each gamma ray peak. The relative geometry between the sample and the Ge  
130 detector was carefully reproduced by a guide apparatus at the sample location.

131 Gamma rays from  $^{134}\text{Cs}$  and  $^{137}\text{Cs}$  were observed for the biofilm samples. The radioactivity  
132 levels for every isotope were determined from the yield of the gamma rays corrected using  
133 the detection efficiency of the Ge detector and a geometrical acceptance between the sample  
134 and the detector. The geometric difference in the height of the sample from the calibration  
135 source was simulated using several electromagnetic simulation codes, including Geant4  
136 (Agostinelli et al., 2003; Allison et al., 2006) and EGS5 (Hirayama et al., 2005). The  
137 radioactivity of the samples were normalized by weight.

138

139 Element analysis

140 To quantitatively analyze the content of 37 elements ( $^7\text{Li}$ ,  $^9\text{Be}$ ,  $^{23}\text{Na}$ ,  $^{24}\text{Mg}$ ,  $^{27}\text{Al}$ ,  $^{39}\text{K}$ ,  $^{43}\text{Ca}$ ,  
141  $^{45}\text{Sc}$ ,  $^{47}\text{Ti}$ ,  $^{51}\text{V}$ ,  $^{52}\text{Cr}$ ,  $^{55}\text{Mn}$ ,  $^{57}\text{Fe}$ ,  $^{59}\text{Co}$ ,  $^{60}\text{Ni}$ ,  $^{63}\text{Cu}$ ,  $^{66}\text{Zn}$ ,  $^{85}\text{Rb}$ ,  $^{88}\text{Sr}$ ,  $^{98}\text{Mo}$ ,  $^{111}\text{Cd}$ ,  $^{133}\text{Cs}$ ,  $^{139}\text{La}$ ,  $^{140}\text{Ce}$ ,  
142  $^{141}\text{Pr}$ ,  $^{146}\text{Nd}$ ,  $^{152}\text{Sm}$ ,  $^{153}\text{Eu}$ ,  $^{158}\text{Gd}$ ,  $^{159}\text{Tb}$ ,  $^{164}\text{Dy}$ ,  $^{165}\text{Ho}$ ,  $^{166}\text{Er}$ ,  $^{169}\text{Tm}$ ,  $^{172}\text{Yb}$ ,  $^{175}\text{Lu}$ , and  $^{202}\text{Hg}$ ) in  
143 the biofilm samples for measurement of radioactivity, the samples were predigested with 5

144 mL of concentrated HNO<sub>3</sub> for 1 h at room temperature. Next, the organic components were  
145 completely decomposed by wet-ashing using a microwave sample preparation system  
146 (Multi-Wave-3000, Perkin Elmer, MA USA) (Itouga et al., 2014). The digested samples were  
147 then brought up to a volume of 50 mL using MilliQ water (MQW) and filtered through 5B  
148 filter paper (Advantec, Tokyo, Japan). The concentrations of the mineral elements were  
149 determined by Inductively Coupled Plasma Mass Spectrometry (ICP-MS, NexION300,  
150 Perkin Elmer). For the ICP-MS analysis, a portion of the filtrated samples was diluted  
151 appropriately with 0.01 mol/L HCl (Itouga et al., 2014). The mineral nutrient concentration  
152 in the samples was calculated as a unit (mg/g in dry weight).  
153 The obtained ICP-MS data were then normalized using the root-sum-of-squares (RSS) levels  
154 for each element. Count data of radioactive cesium (<sup>134</sup>Cs and <sup>137</sup>Cs) were treated with the  
155 same calculation for normalization and then merged with the normalized ICP-MS dataset  
156 (element table).  
157  
158 **ssrDNA analysis**  
159 Genomic DNA was prepared from the stored biofilm samples by capturing on a 0.22- $\mu$ m  
160 Durapore filter, followed by bead-beating with phenol:chloroform:isoamyl alcohol (PCI)  
161 extraction. Bead-beating was performed at 3000 rpm for 5 min (Micro Smash MS-100R,  
162 TOMY, Tokyo, Japan), and nucleic acids were then recovered by ethanol precipitation.  
163 PCR amplification was performed with the extracted genomic DNA using two primer sets  
164 for 16S ssrDNA, 515F/806R (Caporaso et al., 2012; Caporaso et al., 2011) and 18S ssrDNA,  
165 TAREuk454FWD1/TAREukREV3 (Stoeck et al., 2010). The primers were modified for



166 Illumina sequencing with a multi-index kit for the Nextera XT sequencing library  
167 construction kit (Illumina, CA, USA). We also added a "read1" sequence (5'- TCG GCA GCG  
168 TCA GAT GTG TAT AAG AGA CAG -3') to the forward primers and a "read2" sequence (5'-  
169 GTC TCG TGG GCT CGG AGA TGT GTA TAA GAG ACA G -3') to the reverse primers. PCR  
170 was performed with a standard reaction of ExTaq DNA polymerase according to the  
171 manufacturer's instructions (Takara Bio, Kyoto Japan) with 25 pmol of each primer/50  $\mu$ L  
172 reaction mixture. The reactions were performed in a two-step PCR (10 cycles of 94°C for 30 s,  
173 55°C for 45 s, and 72°C for 60 s, followed by 20 cycles of 94°C for 30 s and 72°C for 60 s) for  
174 16S and a 3-step PCR (30 cycles of 94°C for 30 s, 55°C for 45 s and 72°C for 60 s) for 18S. The  
175 amplified products were then purified via 1% agarose gel electrophoresis. The obtained  
176 amplified products were applied to the NexteraXT (Illumina CA USA) sequencing library  
177 construction process without the "tagmentation" process.  
178 A multi-index sequencing library was applied to the MiSeq sequencing kit v1 and read using  
179 Illumina MiSeq according to the instructions in the paired-end sequencing mode. Data were  
180 treated with MiSeq reporter software, and the reads were obtained from individual samples.  
181 After the extraction of the reads, the reads from weeks 4, 5, and 8 for the 18S ssrDNA were  
182 found to be insufficient for analysis. Therefore, subsequent analyses were performed using  
183 the reads from weeks 1, 2, 3, 6, 7, 9, and 10.  
184 The obtained read data were then mapped onto the ribosomal RNA sequence library SILVA  
185 release 108 with the program package QIIME (Caporaso et al., 2010) using "Prefix-suffix  
186 operational taxonomy unit (OTU) picking," and the absolute abundance OTU table at the  
187 family level was constructed. Count zero data were manually removed from the table, and

188 the relative abundance values were calculated. The 16S and 18S data were treated  
189 independently and then merged into a single OTU table with the relative abundance values.  
190 Sequence data have been deposited in the DDBJ sequence read archive under the accession  
191 number DRA004367.

192

193 Statistical analysis

194 For the statistical analysis, we used the program package R (R Core Team, 2014). First, we  
195 drew a heatmap chart with hierarchical cluster analysis (HCA). The heatmap.3 function in  
196 the GMD package, which is a package for non-parametric distance measurements between  
197 two discrete frequency distributions (Zhao et al., 2011), was used to draw the heatmap with  
198 HCA. Independent heatmaps were drawn from each element table and the OTU table with a  
199 two-axis HCA. A scaling option was used for the OTU table treatment according to the row  
200 direction but not for the elements table treatment.

201 Principal components analysis (PCA) was performed with the merged dataset, including  
202 both the OTU table and elements table, using the prcomp function in R. Score plots were  
203 drawn with principal component 1 (PC1; x-axis) and PC2 (y-axis). The loading plots for  
204 quadrants II and III were drawn manually.

205

206

207 Results and Discussion

208 The gamma-ray energy spectra revealed significant peaks corresponding to natural  
209 radioisotope signals, such as that of  $^{40}\text{K}$  (data not shown), for all samples. Furthermore, we

210 found significant peaks corresponding to  $^{134}\text{Cs}$  and  $^{137}\text{Cs}$  from the biofilm samples. However,  
211 we did not detect signals for  $^{134}\text{Cs}$  and  $^{137}\text{Cs}$  from the sea water salts and particles captured  
212 on filter (Table 1).

Table 1. Peak detection from samples

| Material                            | Peak detection    |                   |
|-------------------------------------|-------------------|-------------------|
|                                     | $^{134}\text{Cs}$ | $^{137}\text{Cs}$ |
| Surface sea water salt              | -                 | -                 |
| Bottom sea water salt               | -                 | -                 |
| Captured particles in surface water | -                 | -                 |
| Captured particles in bottom water  | -                 | -                 |
| Biofilms on bottom rocks            | +                 | +                 |

+: significant peak detected from samples

-: significant peak not detected from all samples

Captured particles were filtered from water by 0.22 $\mu\text{m}$  filter and measure radioactivity

213 It is possible that the  $^{134}\text{Cs}$  (half-life: 2.0652 years) and  $^{137}\text{Cs}$  (half-life: 30.1 years) released  
214 owing to prior nuclear weapons tests in the Pacific Ocean and the Chernobyl disaster have  
215 remained in the seabed around Japan. Therefore, we also analyzed samples collected from  
216 near Nishi-kawana in the Tokyo Bay (which is approximately 280 kilometers from the  
217 FDNPP) as controls, but found no significant signals for the radioisotopes  $^{134}\text{Cs}$  and  $^{137}\text{Cs}$   
218 from these control samples. Therefore, we concluded that the radioisotopes detected in the  
219 samples around Hisanohama port in this study originated from the FDNPP disaster rather  
220 than from the environmental background or from past nuclear weapons tests. These results  
221 indicated that the biofilms on the sea floor around Hisanohama retained radioactive  
222 material for at least 8–11 months after the FDNPP accident.  
223 However, the observed radioactivity level was different among the different biofilm samples

224 (Table 2). Therefore, we analyzed the relationship between the microbial consortia within  
225 the biofilms and the elemental composition of the biofilms. To perform this analysis,  
226 quantified element data were combined with radioactivity data for radiocesium ( $^{134}\text{Cs}$  and  
227  $^{137}\text{Cs}$ ) and utilized for statistical analysis. Ribosomal RNA genes were sequenced and used  
228 to construct a dataset for the statistical analysis.

Table 2. Radioactivity of biofilm samples

|        |        | Cs134 Bq/kg dry | Cs137 Bq/kg dry |
|--------|--------|-----------------|-----------------|
| Week1  | Area1  | 1141.78         | 1655.17         |
| Week2  | Area2  | 671.01          | 932.18          |
| Week3  | Area4  | 306.90          | 429.21          |
| Week4  | Area3  | 429.21          | 2353.58         |
| Week5  | Area1  | 926.40          | 1436.73         |
| Week6  | Area4' | 538.56          | 829.08          |
| Week7  | Area4  | 844.49          | 1543.05         |
| Week8  | Area2  | 818.66          | 1607.65         |
| Week9  | Area2  | 359.77          | 591.46          |
| Week10 | Area3' | 190.29          | 294.20          |

229 A HCA heat map chart from the dataset of elements and radiocesium (Fig. 1) showed  
230 relatively higher content of radiocesium, Cr, Ni, Sc, Rb, Li, and cesium (Cs cluster) for the  
231 week 1 sample than for other samples. Another remarkable profile from the elemental  
232 analysis was observed in the week 3 sample, where high relative amounts of lanthanide  
233 elements were detected (Lanth cluster).

234 A PCA score plot (Fig. 2A) of the merged dataset between the elements/radiocesium and the  
235 microbial consortia showed that the week 1 sample was placed in the PC1 negative-PC2  
236 positive direction, and the week 3 sample was placed in the PC1 negative-PC2 negative  
237 direction. As mentioned above, the week 1 sample contained high relative amounts of Cs

238 cluster signals, and the week 3 sample contained high relative amounts of the Lanth cluster  
 239 signals. Consistent with these findings, the PCA loading plot showed that the Cs cluster was  
 240 placed in the PC1 negative-PC2 positive direction (Fig. 2B upper panel, Table S1), and the  
 241 lanthanide cluster was placed in the PC1 negative-PC2 negative direction (Fig. 2B lower  
 242 panel, Table S2). The results of the HCA heat map chart and PCA suggested that a  
 243 "cesium-philic" biofilm occurred at the sampling point in the week 1 sample, and a  
 244 "lanthanide-philic" biofilm occurred at the sampling point in the week 3 sample.  
 245 The PCA results from the datasets of both the elements and the microbes showed candidate  
 246 organisms in the "cesium-philic" and "lanthanide-philic" biofilms on the loading plots,  
 247 because those plots were placed in same loading direction, e.g., PC1 negative-PC2 positive  
 248 (Cs cluster included) or PC1 negative-PC2 negative (Lanth cluster included, Fig. 2C, Table  
 249 S1 and S2). Indeed, the HCA heat map of the organismal consortia showed that the PC1  
 250 negative-PC2 negative-directed organisms mainly appeared in the week 1 column (Fig. 3  
 251 blue dots). The same tendency was observed with the Lanth cluster organisms (Fig. 3 green  
 252 dots). These results suggested that these two OTU sets are positively correlated with the  
 253 Lanth cluster (week 3 sample) and Cs cluster (week 1 sample) elements.

Table 3. Cs cluster taxon in Week1 sample

| OTU ID   | Taxon information                                            | Relative intensity |
|----------|--------------------------------------------------------------|--------------------|
| Primer18 |                                                              |                    |
| S_Euk_2  | Eukaryota;Alveolata;Dinophyceae;Gonyaulacales;Gonyaulacaceae | 0.02974            |
| Primer18 |                                                              |                    |
| S_Euk_4  | Eukaryota;Metazoa;Annelida;Clitellata;Oligochaeta            | 0.10316            |
| Primer18 | Eukaryota;Metazoa;Annelida;Polychaeta;Scolecida              | 0.02144            |

|          |                                                                        |         |
|----------|------------------------------------------------------------------------|---------|
| S_Euk_7  |                                                                        |         |
| Primer18 |                                                                        |         |
| S_Euk_8  | Eukaryota;Metazoa;Arthropoda;Chelicerata;Arachnida                     | 0.00847 |
| Primer18 |                                                                        |         |
| S_Euk_11 | Eukaryota;Metazoa;Arthropoda;Crustacea;Maxillopoda                     | 0.06880 |
| Primer18 |                                                                        |         |
| S_Euk_12 | Eukaryota;Metazoa;Brachiopoda;Linguliformea;Lingulata                  | 0.03599 |
| Primer18 |                                                                        |         |
| S_Euk_15 | Eukaryota;Metazoa;Cnidaria;Anthozoa;Hexacorallia                       | 0.14012 |
| Primer18 |                                                                        |         |
| S_Euk_23 | Eukaryota;Metazoa;environmental samples;uncultured metazoan;Other      | 0.02215 |
| Primer18 |                                                                        |         |
| S_Euk_25 | Eukaryota;Rhodophyta;Florideophyceae;Ceramiales;Ceramiaceae            | 0.05550 |
| Primer18 |                                                                        |         |
| S_Euk_27 | Eukaryota;Rhodophyta;Florideophyceae;Ceramiales;Delesseriaceae         | 0.01796 |
| Primer18 |                                                                        |         |
| S_Euk_34 | Eukaryota;environmental samples;uncultured eukaryote;Other;Other       | 0.03092 |
| Primer18 | Eukaryota;environmental samples;uncultured freshwater                  |         |
| S_Euk_35 | eukaryote;Other;Other                                                  | 0.00399 |
| Primer18 |                                                                        |         |
| S_Euk_39 | Eukaryota;stramenopiles;Chrysophyceae;Hibberdiales;Hibberdiaceae       | 0.00977 |
| Primer16 |                                                                        |         |
| S_Arch_1 | Archaea;Crenarchaeota;Marine Group I;uncultured archaeon;Other         | 0.06712 |
| Primer16 |                                                                        |         |
| S_Bac_1  | Bacteria;Acidobacteria;RB25;uncultured bacterium;Other                 | 0.00588 |
| Primer16 | Bacteria;Actinobacteria;Acidimicrobiia;Acidimicrobiales;Sva0996 marine |         |
| S_Bac_2  | group                                                                  | 0.02444 |
| Primer16 |                                                                        |         |
| S_Bac_3  | Bacteria;Actinobacteria;Acidimicrobiia;Acidimicrobiales;uncultured     | 0.02674 |
| Primer16 |                                                                        |         |
| S_Bac_4  | Bacteria;Bacteroidetes;Cytophagia;Cytophagales;Flammeovirgaceae        | 0.07348 |
| Primer16 | Bacteria;Bacteroidetes;Flavobacteria;Flavobacteriales;Cryomorphaceae   | 0.00429 |

|          |                                                                          |         |
|----------|--------------------------------------------------------------------------|---------|
| S_Bac_5  |                                                                          |         |
| Primer16 | Bacteria;Bacteroidetes;Sphingobacteria;Sphingobacteriales;Saprospiracea  |         |
| S_Bac_7  | e                                                                        | 0.01855 |
| Primer16 |                                                                          |         |
| S_Bac_9  | Bacteria;Cyanobacteria;Chloroplast;uncultured bacterium;Other            | 0.00919 |
| Primer16 | Bacteria;Proteobacteria;Alphaproteobacteria;Rhizobiales;Hyphomicrobiace  |         |
| S_Bac_16 | ae                                                                       | 0.00994 |
| Primer16 | Bacteria;Proteobacteria;Alphaproteobacteria;Rhizobiales;Phyllobacteriace |         |
| S_Bac_18 | ae                                                                       | 0.00703 |
| Primer16 | Bacteria;Proteobacteria;Alphaproteobacteria;Rhodobacterales;Rhodobacte   |         |
| S_Bac_20 | raceae                                                                   | 0.15535 |
| Primer16 | Bacteria;Proteobacteria;Alphaproteobacteria;Sphingomonadales;Erythroba   |         |
| S_Bac_21 | cteraceae                                                                | 0.01248 |
| Primer16 | Bacteria;Proteobacteria;Deltaproteobacteria;Desulfobacterales;Desulfobac |         |
| S_Bac_28 | teraceae                                                                 | 0.01218 |
| Primer16 | Bacteria;Proteobacteria;Deltaproteobacteria;Desulfobacterales;Desulfobul |         |
| S_Bac_29 | baceae                                                                   | 0.00744 |
| Primer16 | Bacteria;Proteobacteria;Deltaproteobacteria;Sh765B-TzT-29;uncultured     |         |
| S_Bac_31 | delta proteobacterium                                                    | 0.01246 |
| Primer16 | Bacteria;Proteobacteria;Epsilonproteobacteria;Campylobacterales;Helicob  |         |
| S_Bac_32 | acteraceae                                                               | 0.00372 |
| Primer16 | Bacteria;Proteobacteria;Gammaproteobacteria;BD7-8 marine                 |         |
| S_Bac_35 | group;uncultured bacterium                                               | 0.02819 |
| Primer16 | Bacteria;Proteobacteria;Gammaproteobacteria;E01-9C-26 marine             |         |
| S_Bac_37 | group;uncultured bacterium HERMI11                                       | 0.00922 |
| Primer16 | Bacteria;Proteobacteria;Gammaproteobacteria;KI89A clade;uncultured       |         |
| S_Bac_38 | gamma proteobacterium                                                    | 0.11585 |
| Primer16 | Bacteria;Proteobacteria;Gammaproteobacteria;Oceanospirillales;OM182      |         |
| S_Bac_39 | clade                                                                    | 0.01344 |
| Primer16 | Bacteria;Proteobacteria;Gammaproteobacteria;Oceanospirillales;Oceanosp   |         |
| S_Bac_40 | irillaceae                                                               | 0.04369 |
| Primer16 | Bacteria;Proteobacteria;Gammaproteobacteria;Oceanospirillales;SS1-B-0    | 0.00422 |

|          |                                                                      |         |
|----------|----------------------------------------------------------------------|---------|
| S_Bac_41 | 6-26                                                                 |         |
| Primer16 | Bacteria;Proteobacteria;Gammaproteobacteria;Order Incertae           |         |
| S_Bac_42 | Sedis;Family Incertae Sedis                                          | 0.04639 |
| Primer16 | Bacteria;Proteobacteria;Gammaproteobacteria;Xanthomonadales;Sinobact |         |
| S_Bac_46 | eraceae                                                              | 0.02341 |
| Primer16 |                                                                      |         |
| S_Bac_48 | Bacteria;Verrucomicrobia;Verrucomicrobiae;Verrucomicrobiales;DEV007  | 0.00691 |

---

254 Table 3 lists the OTU set contents that correlated with Cs cluster elements, including  
255 radiocesium, and the relative intensity of each OTU in the biofilm community. The most  
256 abundant taxa in this OTU set were *Hexacorallia* and *Oligochaete* among the eukaryotes.  
257 For bacteria, high relative intensities of *Bacteroidetes*, *Rhodobacteraceae*, and  
258 *Gammaproteobacteria* were observed. Although a primer set that did not target Archaea  
259 was used, archeal sequences were obtained in this work by sequencing amplicons generated  
260 using the 16S ribosomal RNA primer set. An uncultured *Crenarcheota* in marine group I  
261 was observed to be one of the dominant OTUs with a correlation with Cs cluster elements.  
262 Previously, *Alpha*- and *Gamma*-*proteobacteria* have been obtained from biofilms on the  
263 surface of nuclear fuel pools (Sarró et al., 2005). According to Sarro et al. (Sarró et al., 2005),  
264 biofilms obtained from nuclear fuel pools accumulate <sup>60</sup>Co. In our study, cobalt accumulation  
265 in the week 1 sample was suggested by the PCA data (Fig. 2B upper panel and Table S1)  
266 despite a lack of <sup>60</sup>Co signal during gamma-ray spectroscopy. Microbial community retrieved  
267 from nuclear fuel pools have been described previously as capable of accumulating both <sup>60</sup>Co  
268 and <sup>137</sup>Cs (Tišáková et al., 2012). Our results suggest that the biofilm sampled in week 1 in  
269 our study presents similar characteristics to the microbes described by Sarro et al. and  
270 Tisakova et al. in the above-mentioned previous studies.



271

272 Conclusions

273 In this study, we found that biofilms retain a relatively high amount of radioactive cesium in  
274 their microbial communities even after more than half a year from the release of radioactive  
275 elements into oceans due to nuclear power plant accidents. Our statistical analysis also  
276 indicated that different community structures of biofilms show different affinities for  
277 radiocesium. Our results suggested biofilms as a point of entry for radioactive elements into  
278 the eco-system owing to long-term retention of radiocesium in the biofilm communities.

279 In the future, further research on the accumulation and retention of radioactive elements by  
280 marine biofilm communities needs to be undertaken to obtain information that can be used  
281 for developing ways to eliminate radioactive contamination and for monitoring of  
282 environmental pollution by radiocesium.

283

284

285 Acknowledgements

286 This work was supported by grants for the RIKEN Incentive Research Project (FY2011)  
287 “Emergency monitoring for possible cycling of radio active compounds via oceanic food web”  
288 awarded to SM and HO and a MEXT Grant-in-Aid for Scientific Research on Innovative  
289 Areas (No. 23117003) awarded to SM and KK. We also wish to thank the Iwaki City Fishery  
290 Association for permitting the sampling for our study and for providing the fishing vessel  
291 Shyo-ei-maru and supporting crew belonging to the abalone section of the Iwaki Fishery  
292 Association for our study. We are also grateful to Toshiyuki Suzuki for overseeing and

293 ensuring the diving safety of SM. The authors also wish to acknowledge the profound  
294 academic comments and proofreading provided by R. Craig Everroad and Diogo M. O.  
295 Ogawa.  
296  
297  
298 References  
299 Agostinelli, S., Allison, J., Amako, K., Apostolakis, J., Araujo, H., Arce, P., Asai, M., Axen, D.,  
300 Banerjee, S., Barrand, G., et al. (2003). Geant4—a simulation toolkit. *Nuclear*  
301 *Instruments and Methods in Physics Research Section A: Accelerators, Spectrometers,*  
302 *Detectors and Associated Equipment* 506, 250–303.  
303 Allison, J., Amako, K. and Apostolakis, J. (2006). IEEE Xplore Abstract - Geant4  
304 developments and applications. *Nuclear Science* 53, 270–278.  
305 Caporaso, J. G., Kuczynski, J., Stombaugh, J., Bittinger, K., Bushman, F. D., Costello, E. K.,  
306 Fierer, N., Peña, A. G., Goodrich, J. K., Gordon, J. I., et al. (2010). QIIME allows  
307 analysis of high-throughput community sequencing data. *Nat. Methods* 7, 335–336.  
308 Caporaso, J. G., Lauber, C. L., Walters, W. A., Berg-Lyons, D., Huntley, J., Fierer, N.,  
309 Owens, S. M., Betley, J., Fraser, L., Bauer, M., et al. (2012). Ultra-high-throughput  
310 microbial community analysis on the Illumina HiSeq and MiSeq platforms. *ISME J* 6,  
311 1621–1624.

- 312 Caporaso, J. G., Lauber, C. L., Walters, W. A., Berg-Lyons, D., Lozupone, C. A., Turnbaugh,  
313 P. J., Fierer, N. and Knight, R. (2011). Global patterns of 16S rRNA diversity at a depth  
314 of millions of sequences per sample. *Proceedings of the National Academy of Sciences*  
315 108 Suppl 1, 4516–4522.
- 316 HABA, H., KANAYA, J., MUKAI, H., KAMBARA, T. and KASE, M. (2012). One-year  
317 monitoring of airborne radionuclides in Wako, Japan, after the Fukushima Dai-ichi  
318 nuclear power plant accident in 2011. *Geochem. J.* 46, 271–278.
- 319 Hirayama, H., Namito, Y., Nelson, W. R. and Bielajew, A. F. (2005). The EGS5 code system.
- 320 Itouga M., Kato Y., Sakakibara H. (2014). Phenotypic plasticity and mineral nutrient  
321 uptake of the moss *Polytrichum commune* Hedw. (Polytrichaceae, Bryophyta) during  
322 acclimation to a change in light intensity. *Hikobia* 16, 459–466.
- 323 Kanda, J. (2012). Long-term Sources: To what extent are marine sediments, coastal  
324 groundwater, and rivers a source of ongoing contaminaton? pp. 1–19. Tokyo.
- 325 Sarró, M. I., García, A. M. and Moreno, D. A. (2005). Biofilm formation in spent nuclear fuel  
326 pools and bioremediation of radioactive water. *Int. Microbiol.* 8, 223–230.
- 327 Stoeck, T., Bass, D., Nebel, M., Christen, R., Jones, M. D. M., Breiner, H.-W. and Richards, T.  
328 A. (2010). Multiple marker parallel tag environmental DNA sequencing reveals a highly  
329 complex eukaryotic community in marine anoxic water. *Mol Ecol* 19 Suppl 1, 21–31.

- 330 Team, R. C. (2014). R: A language and environment for statistical computing.  
331 [www.R-project.org](http://www.R-project.org).
- 332 Tišáková, L., Pipiška, M., Godány, A., Horník, M., Vidová, B. and Augustín, J. (2012).  
333 Bioaccumulation of <sup>137</sup>Cs and <sup>60</sup>Co by bacteria isolated from spent nuclear fuel pools. *J*  
334 *Radioanal Nucl Chem* 295, 737–748.
- 335 Wada, T., Nemoto, Y., Shimamura, S., Fujita, T., Mizuno, T., Sohtome, T., Kamiyama, K.,  
336 Morita, T. and Igarashi, S. (2013). Effects of the nuclear disaster on marine products in  
337 Fukushima. *Journal of Environmental Radioactivity* 124, 246–254.
- 338 Zhao, X., Valen, E., Parker, B. J. and Sandelin, A. (2011). Systematic clustering of  
339 transcription start site landscapes. *PLoS ONE* 6, e23409.
- 340
- 341 Figure legends
- 342 Figure 1
- 343 Heatmap chart of the elements and radioactivity data from the biofilm samples based on  
344 hierarchical clustering analysis (HCA). The heatmap chart was sorted by HCA for both axes  
345 (elements axis and sample axis). Boxes indicate clusters of radiocesium (Cs cluster) or  
346 lanthanides (Lanth cluster).
- 347
- 348 Figure 2
- 349 Principal component analysis (PCA) results for the sampling sites with microbial consortia

350 data and element data with radiocesium. Panel A is the PCA score plot among sampling  
351 sites. Each dot indicates one sampling site. Panel B indicates the loading plot of the  
352 elements data. The upper panel shows the plot of elements that contribute to the  
353 PC1-negative and PC2-positive directions (supplementary table 1), indicating that they  
354 contribute to separate week 1 samples in the PC1-negative and PC2-positive directions. The  
355 lower panel shows the plot of elements that contribute to the PC1-negative and  
356 PC2-negative directions (supplementary table 2), indicating that they contribute to separate  
357 week 3 samples in the PC1-negative and PC2-negative directions in the PCA score plot.  
358 Panel C indicates the loading plot of the microbial consortia data. The upper panel displays  
359 the plot of operational taxonomic units (OTUs) that contribute to the PC1-negative and  
360 PC2-positive direction (supplementary table 1), indicating that they contribute to separate  
361 week 1 samples in the PCA score plot. The lower panel shows the plot of the OTUs that  
362 contribute to the PC1-negative and PC2-negative directions (supplementary table 2),  
363 indicating that they contribute to separate week 3 samples in the PCA score plot.  
364  
365 Figure 3  
366 Heatmap chart of microbial consortia data for biofilms with HCA.  
367 The heatmap chart has been sorted by HCA for both axes (OTU axis and sample axis).  
368 Green and blue dots indicate contributing OTUs for the PC1-negative and PC2-positive  
369 directions and the PC1/PC2-negative direction, respectively. The relative intensity value  
370 has been scaled and centered in the row direction.

371

372 Supplementary tables.xlsx

373 Supplementary table 1

374 Supplementary table 2

Fig.1

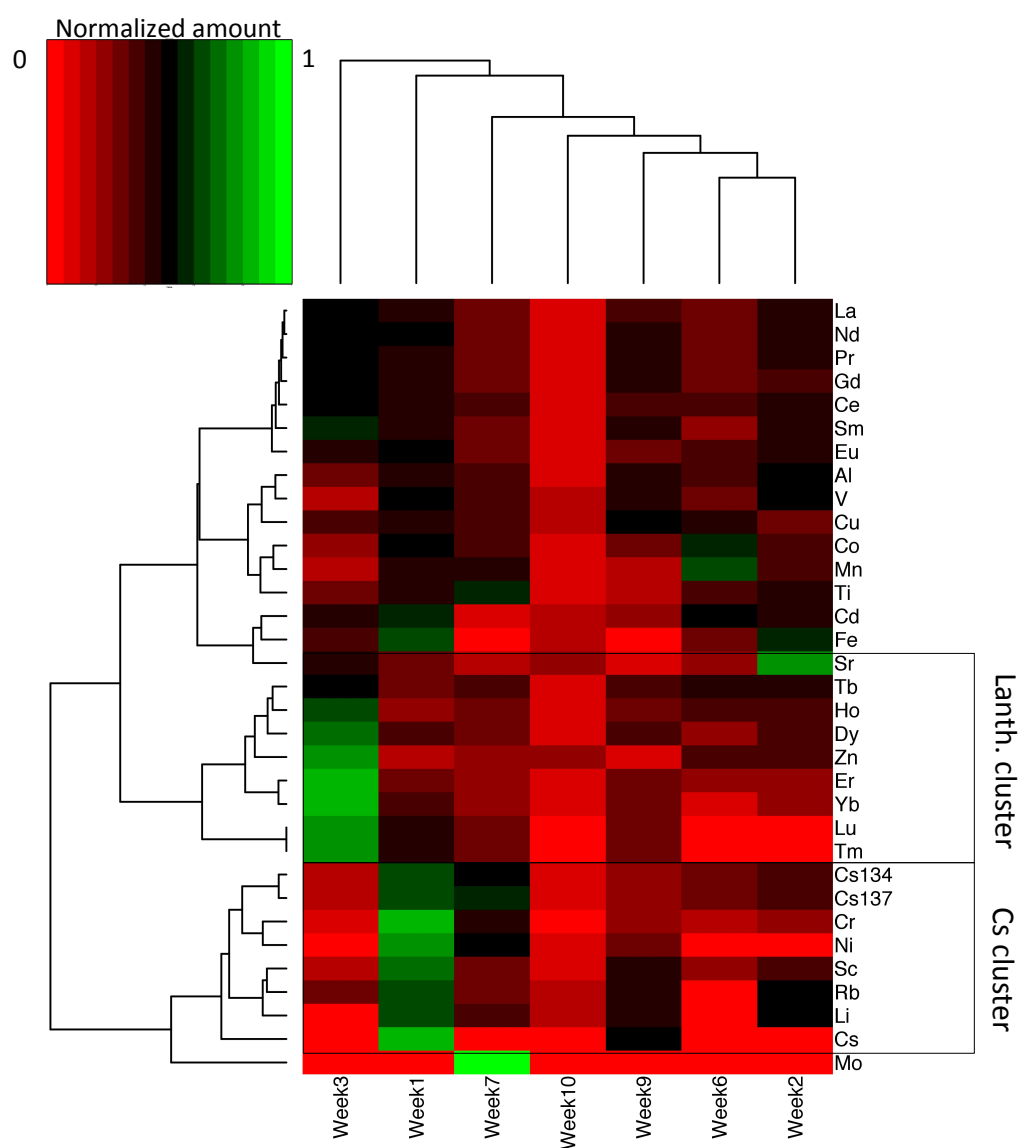

Fig.2

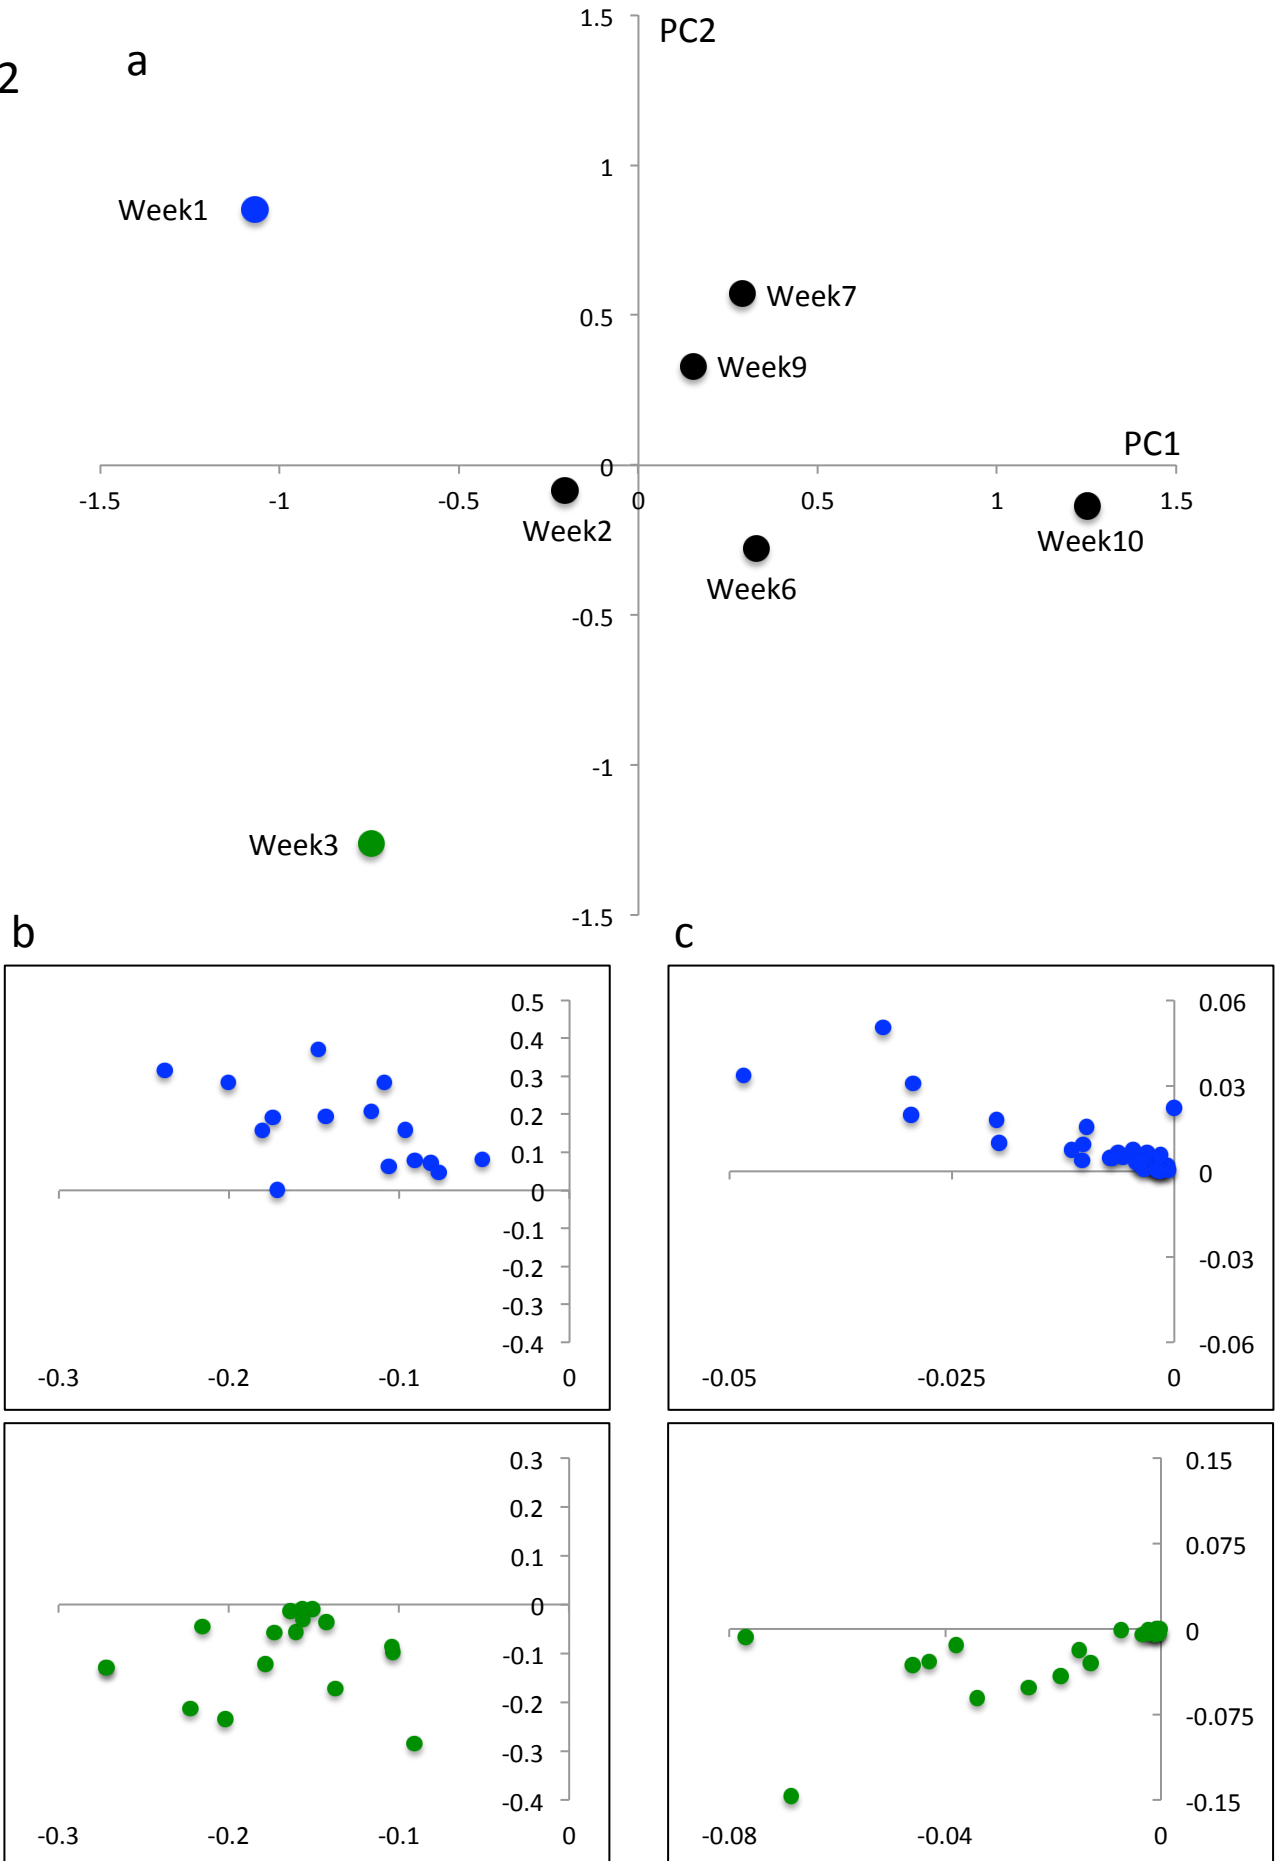



Fig.3

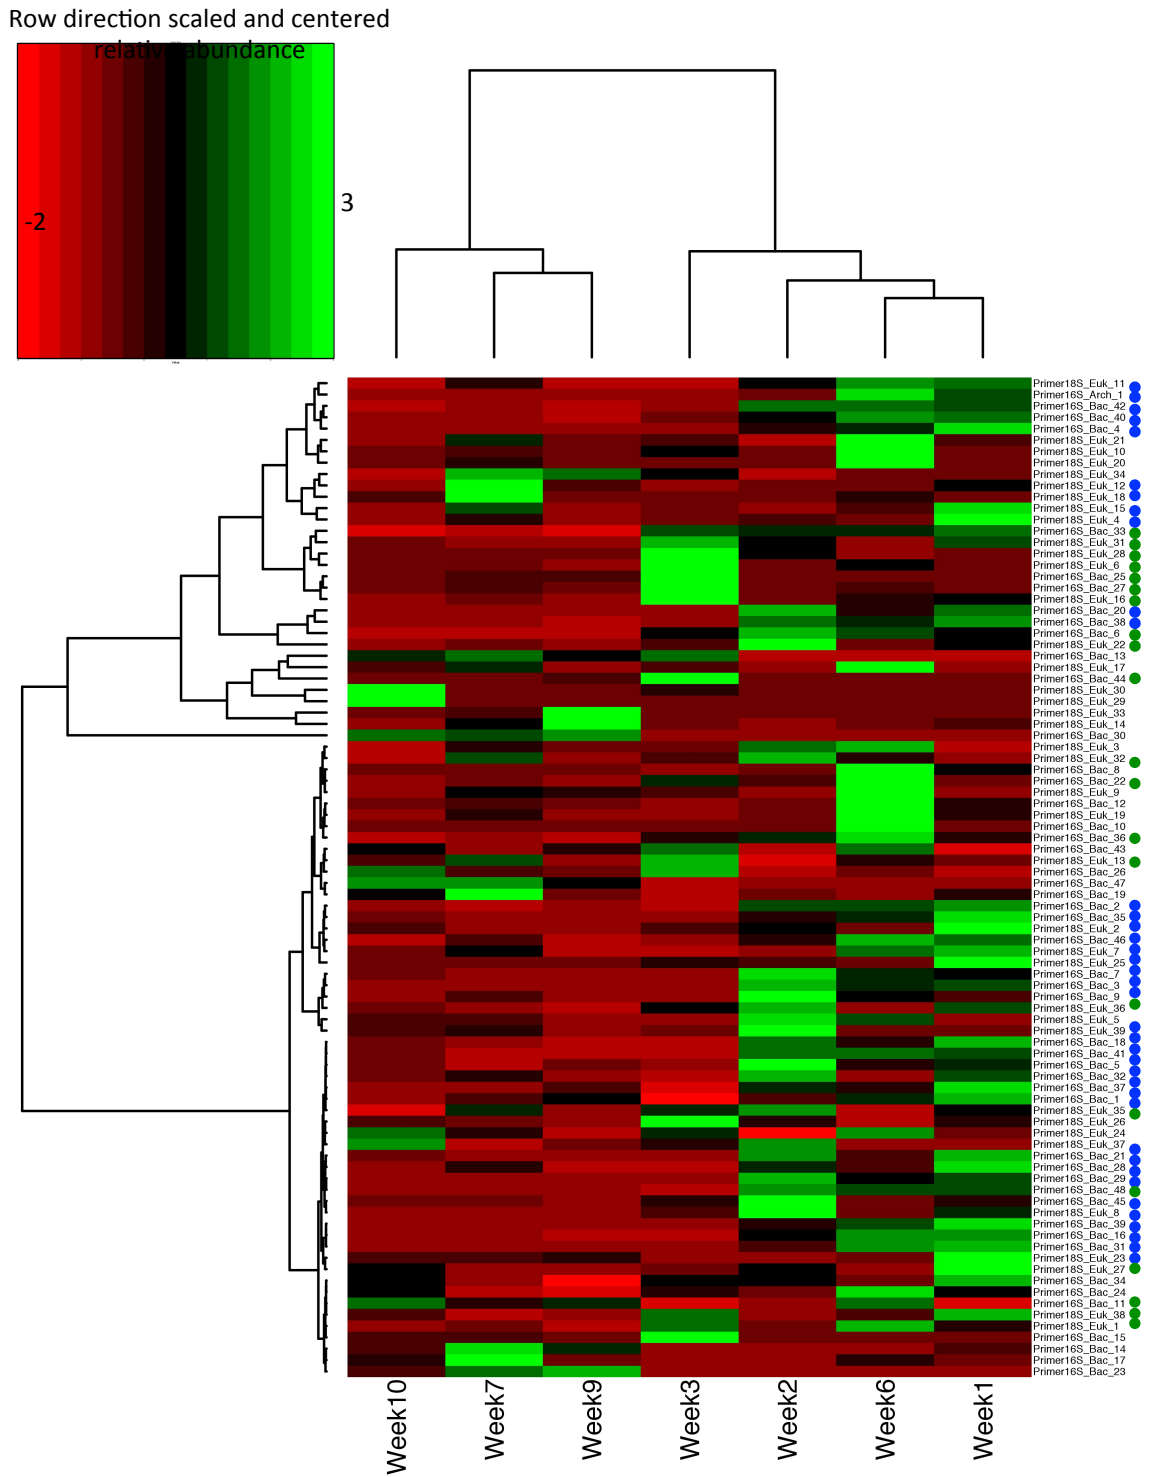

Source: https://www.biorxiv.org/content/biorxiv/early/2017/07/04/106211.full.pdf
